# Supplementary material for: Sustainable route for the synthesis of flower-like Ni@N-doped carbon nanosheets from bagasse and its catalytic activity towards reductive amination of nitroarenes with bio-derived aldehydes
Source: Royal Society of Chemistry journal article supplement (doi:10.1039/d0nj04673f), 2020-01-01
Supplement: d0nj04673f1.pdf [file d0nj04673f1.pdf]

## **Sustainable Route for the Synthesis of Flowers-like Ni@N-doped Carbon Nanosheets from Bagasse and its Catalytic Activity towards Reductive Amination of Nitroarenes with Bio-derived Aldehydes**

Krishnan Ravi,<sup>a,b</sup> Jacky H. Advani,<sup>a,b</sup> Balasaheb D. Bankar,<sup>a,b</sup> Amravati S. Singh<sup>a,b</sup> and Ankush V. Biradar<sup>a,b,\*</sup>

<sup>a</sup>Inorganic Materials and Catalysis Division, CSIR-Central Salt and Marine Chemicals Research Institute, G. B. Marg, Bhavnagar-364 002, Gujarat, India

<sup>b</sup>Academy of Scientific and Innovative Research (AcSIR), Ghaziabad-201 002, Uttar Pradesh, India

### **Contents**

| <b>S.No</b> | <b>Contents</b>                                                           | <b>Page. No.</b> |
|-------------|---------------------------------------------------------------------------|------------------|
| 1.          | S1. Physicochemical methods                                               | 2                |
| 2.          | S2. BET analysis of BC and Ni@NC-DC                                       | 3                |
| 3.          | S3. HRTEM images of before and after reduction of Ni@NC-DC                | 3                |
| 4.          | S4. The particle size distribution of the Ni@NC-DC catalyst               | 4                |
| 5.          | S5. Catalytic activity formula                                            | 4                |
| 6.          | S6. GCMS Spectrum of products                                             | 4-9              |
| 7.          | S7. Recyclability studies of the Ni@NC-DC catalyst                        | 10               |
| 8.          | S8. FESEM Elemental mapping of fresh and recycled catalyst                | 10-11            |
| 9.          | S9. Comparison table for reductive amination using heterogeneous catalyst | 12-13            |

## S1. Physicochemical Methods

Powder X-ray diffraction (PXRD) data were collected using a PANalytical Empyrean (PIXcel 3D detector) system equipped with Cu K $\alpha$  ( $\lambda=1.54$  Å) radiation. The infrared spectra (IR) of the samples were recorded using the KBr pellet method on a Perkin–Elmer GX FTIR spectrometer in the region of 400–4000 cm<sup>-1</sup>. Scanning electron microscopy (SEM) images were recorded on a microscope (JEOL JSM 7100F) with an accelerating voltage of 18 kV and with a probe current of 102 AMP. The transmission electron microscopy (TEM), high-resolution TEM observation was acquired on JEOL, JEM 2100 with an electron acceleration energy of 200 kV. The samples were ultrasonically dispersed in IPA for 30 min and deposited on the copper grid using capillary and dried overnight in air. The content of Ni in the catalysts was determined Inductive coupled plasma (ICP) analysis of the catalyst was carried out on Perkin Elmer, Optima 2000. The reaction mixture was analyzed by Gas Chromatography (GC-7890B and GC-MS (Shimadzu, QP-2010, Japan), with HP-5 column which consists of 5% diphenyl and 95% dimethyl polysiloxane capillary column and FID as a detector. The surface area of the catalyst was calculated using the Branauer-Emmette-Teller (BET) equation (micromeritics). X-ray photoelectron spectroscopy (XPS) was performed using an ESCA+ (Omicron Nanotechnology, Germany) with a monochromatized Al-K $\alpha$  X-ray ( $h\nu = 1486.7$  eV) as the excitation source (15 kV and 20 mA). The pass energy for the survey spectrum was 50 eV and 20 eV in the case of the short scan. The sample was placed on the copper tape and degassed in the XPS FEL chamber to minimize the air contamination. A charge neutralizer of 2 keV was used to overcome any charging problem, and the calibration was done using the adventitious C 1s feature at 284.6 eV as a reference. All the spectra were recorded at 90° of the X-ray source. <sup>13</sup>C solid-state nuclear resonance (NMR) spectroscopy was performed using a Bruker 11.7 T spectrometer equipped with a triple resonance 2.5 mm solid-state probe head and an avance III console. All experiments were performed at room temperature

## S2. BET analysis of BC and Ni@NC-DC

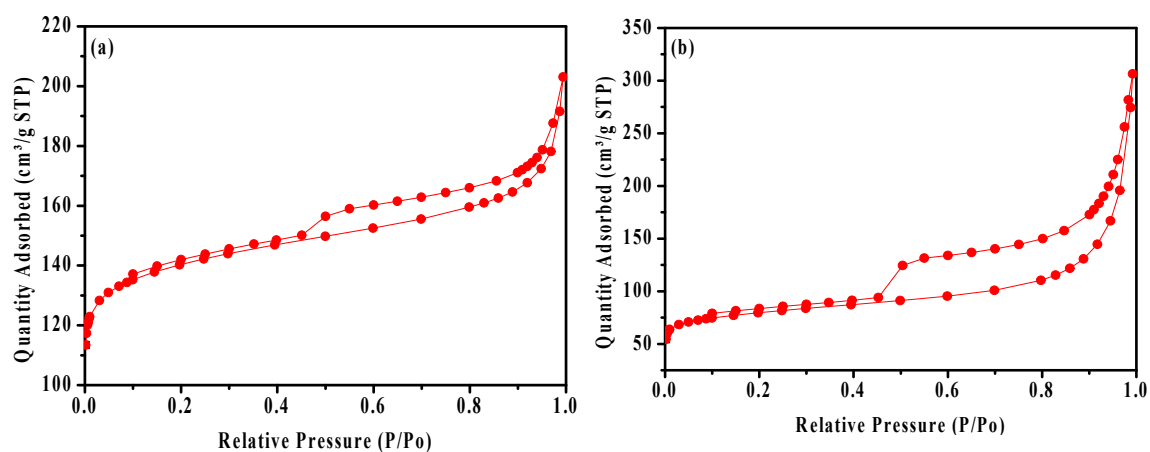

**Figure S1.** (a) BET spectrum of BC and (b) BET spectrum of Ni@NC-DC

## S3. HRTEM images of before and after reduction of Ni@NC-DC

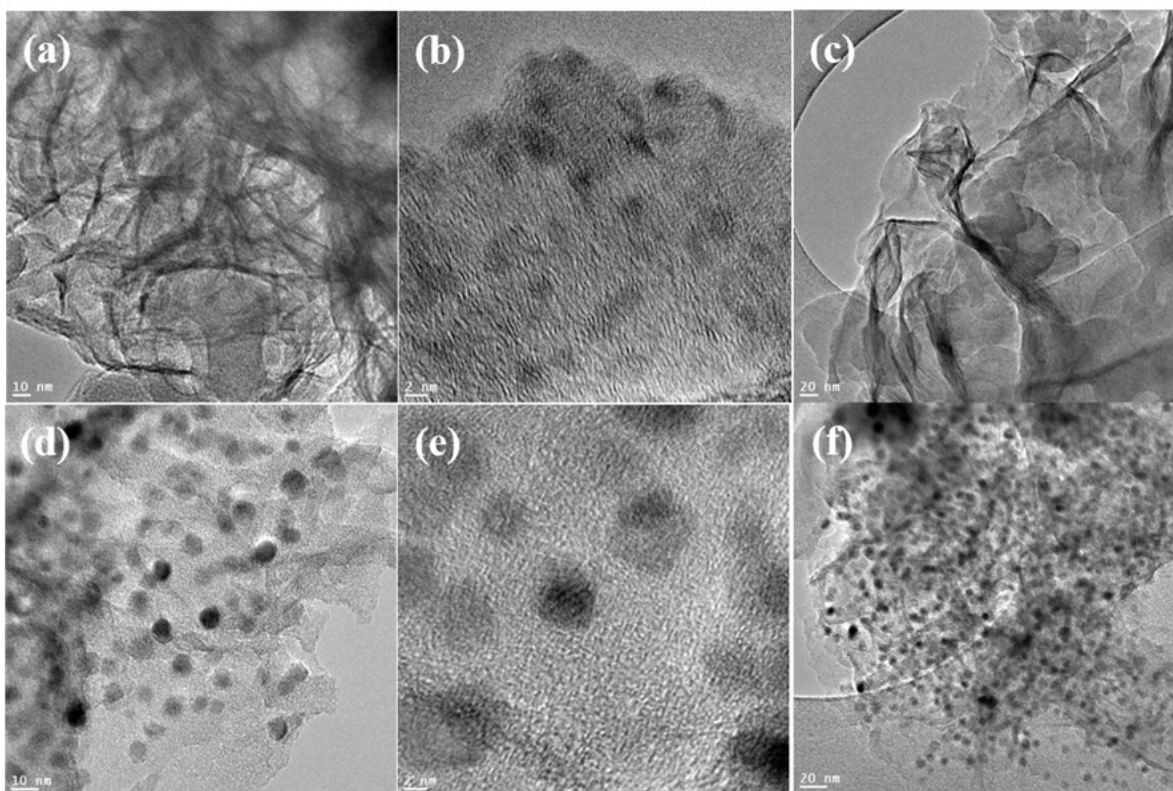

**Figure S2.** (a-c) HRTEM images before the reduction of Ni@NC-DC, (d-f) HRTEM images after the reduction of Ni@NC-DC.

#### S4. Particle size distribution of Ni@NC-DC catalyst

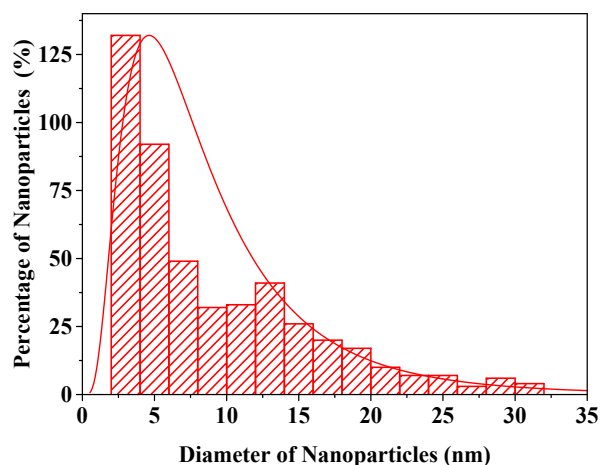

**Figure S3.** The particle size distribution of Ni@NC-DC catalyst.

#### S5. Activity of the catalyst

The activity of the catalyst was obtained by using the following formula

$$\text{Catalytic activity} = \frac{\text{mmoles of the desired product formed}}{\text{gram of active catalyst} \times \text{reaction time in h}} \text{ mmol} \cdot \text{g}^{-1} \cdot \text{h}^{-1}$$

#### S6. GC-Mass spectrum of products

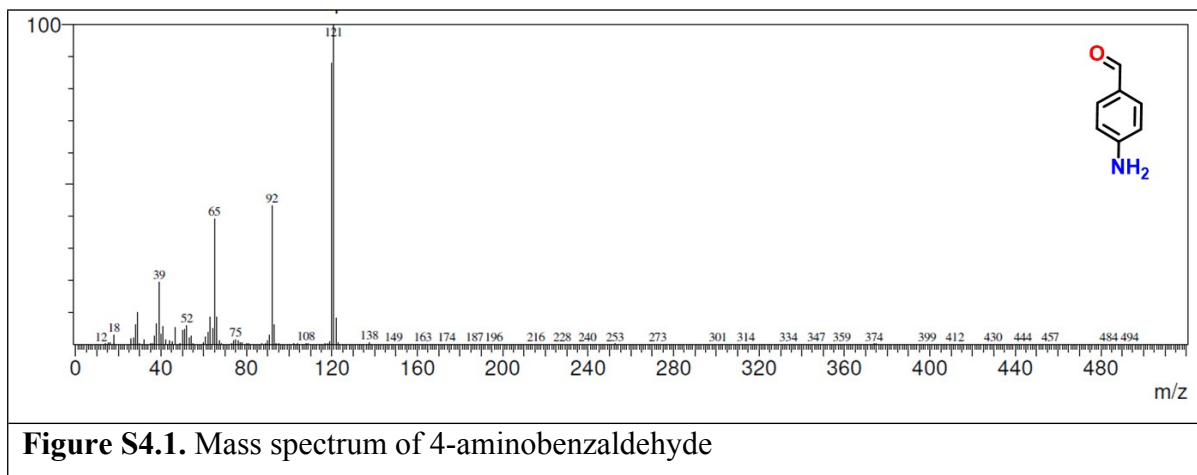

**Figure S4.1.** Mass spectrum of 4-aminobenzaldehyde

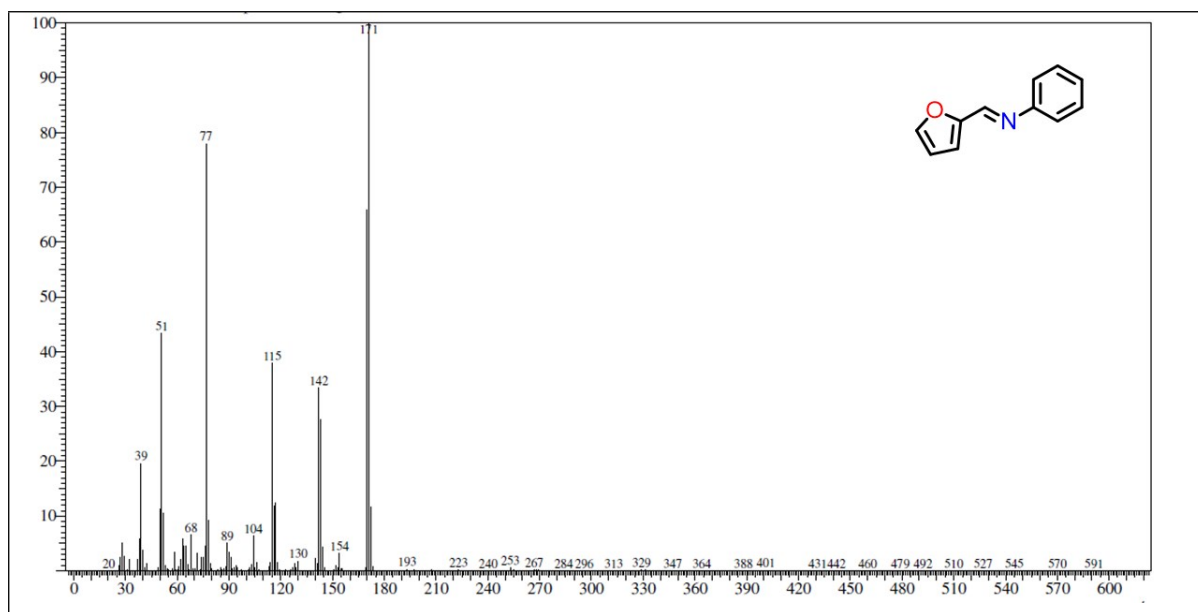

**Figure S4.2.** Mass spectrum of 1-(furan-2-yl)-N-phenylmethanimine

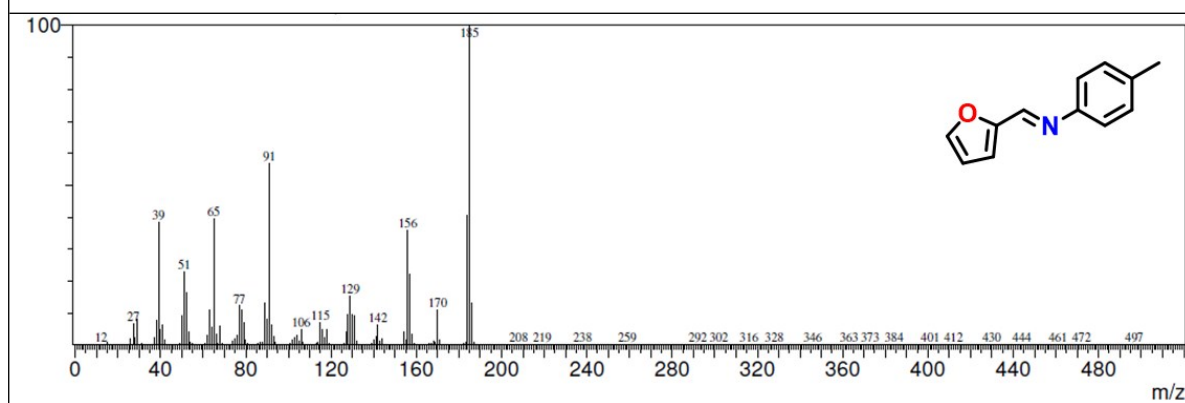

**Figure S4.3.** Mass spectrum of 1-(furan-2-yl)-N-(p-tolyl)methanimine

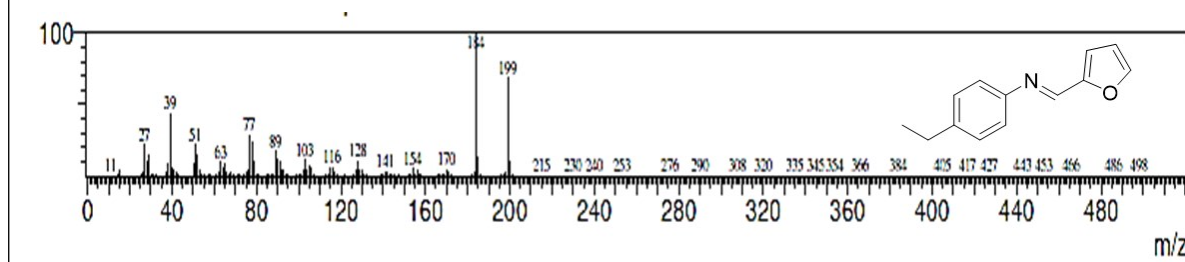

**Figure S4.4.** Mass spectrum of N-(4-ethylphenyl)-1-(furan-2-yl)methanimine

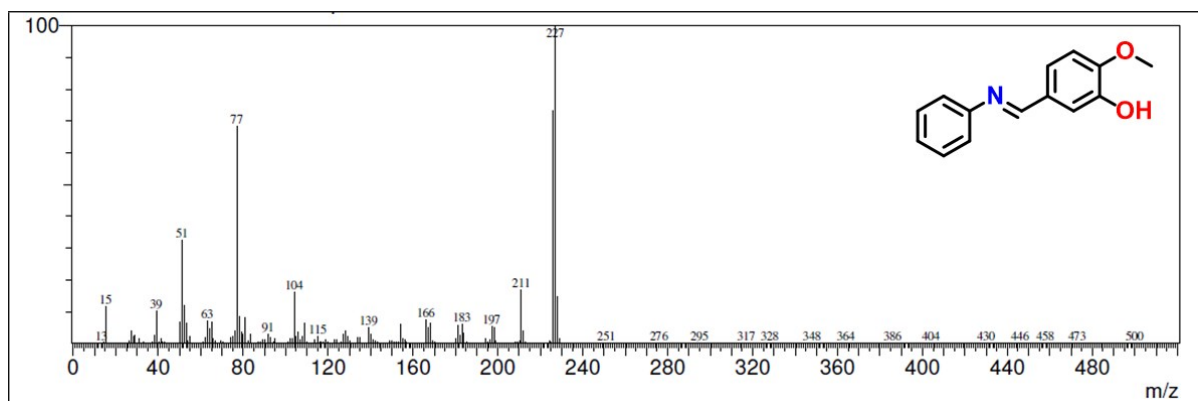

**Figure S4.5.** Mass spectrum of 2-methoxy-5-((phenylimino)methyl)phenol

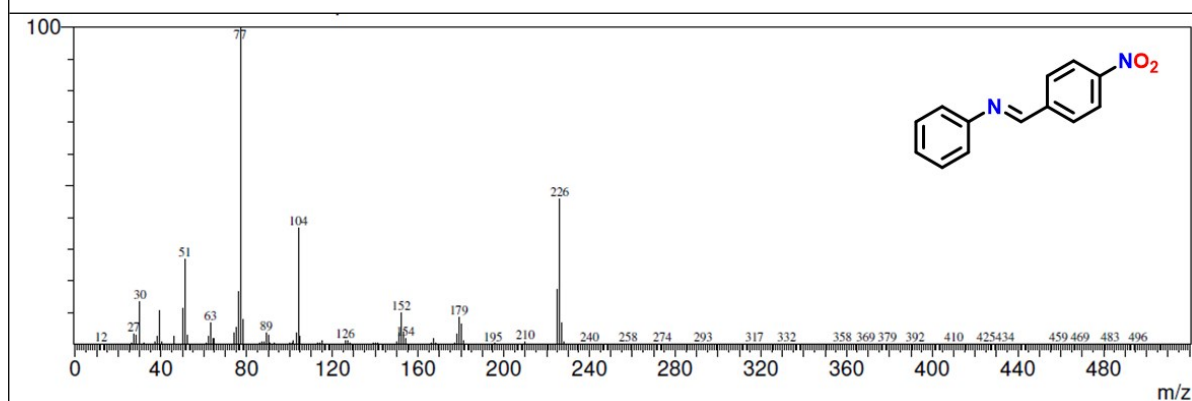

**Figure S4.6.** Mass spectrum of 1-(4-nitrophenyl)-N-phenylmethanimine

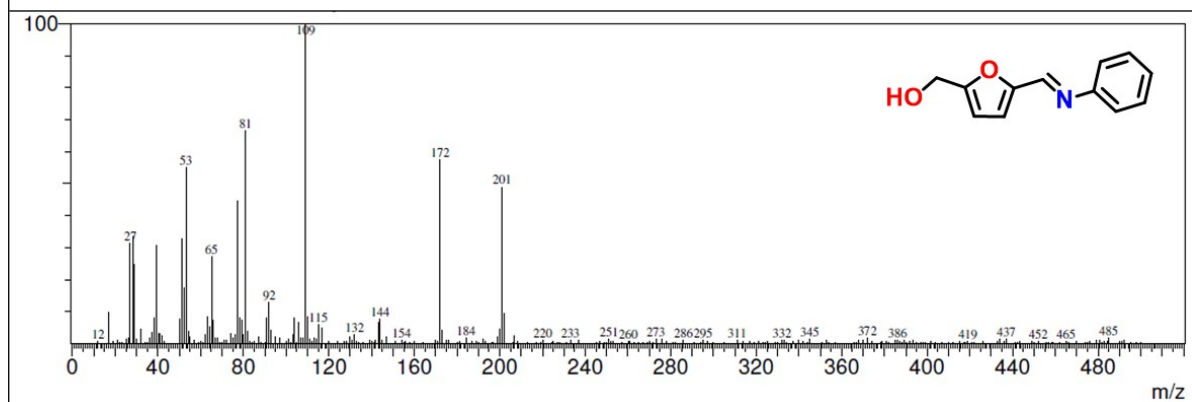

**Figure S4.7.** Mass spectrum of 5-(benzylideneamino)furan-2-yl)methanol

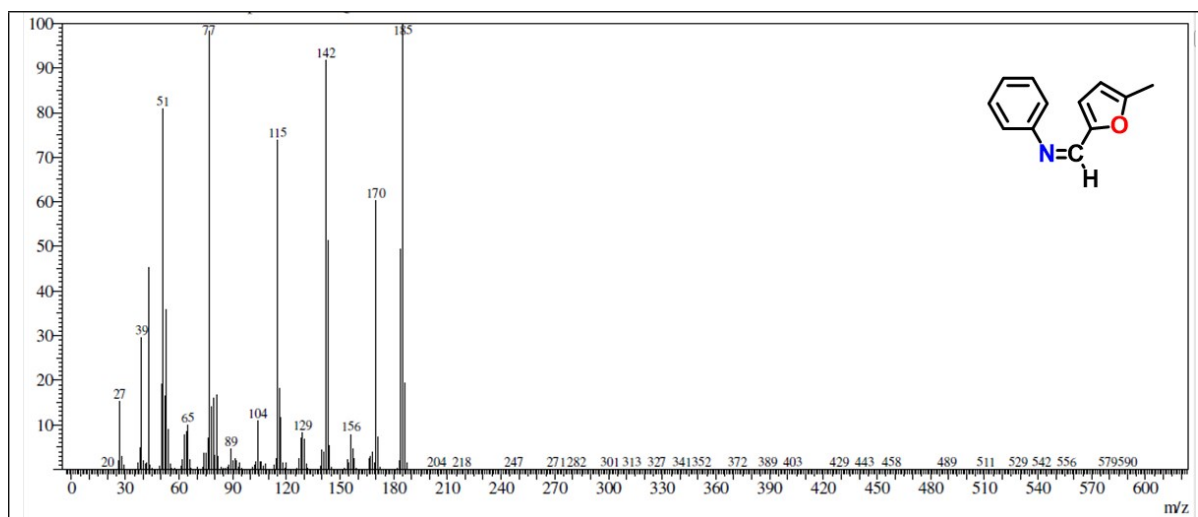

**Figure S4.8.** Mass spectrum of *N*-(5-methylfuran-2-yl)-1-phenylmethanimine

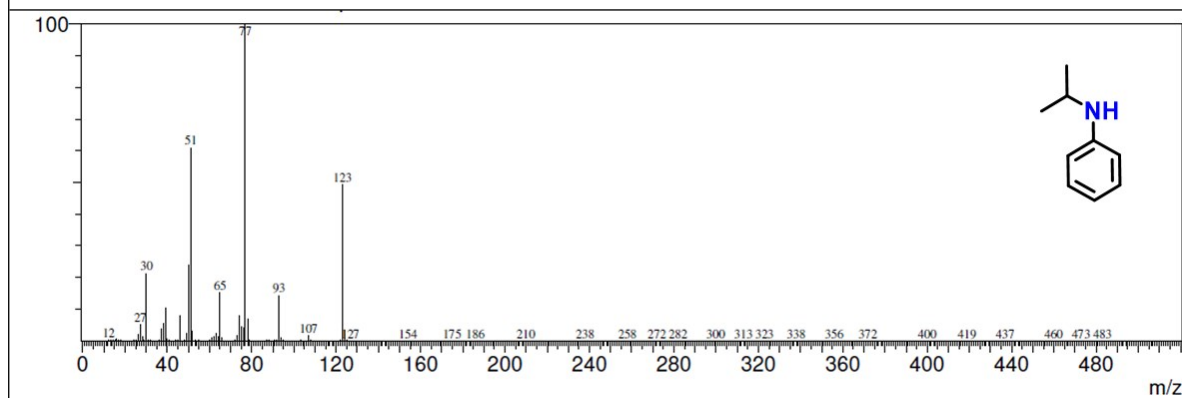

**Figure S4.9.** Mass spectrum of *N*-Isopropylaniline

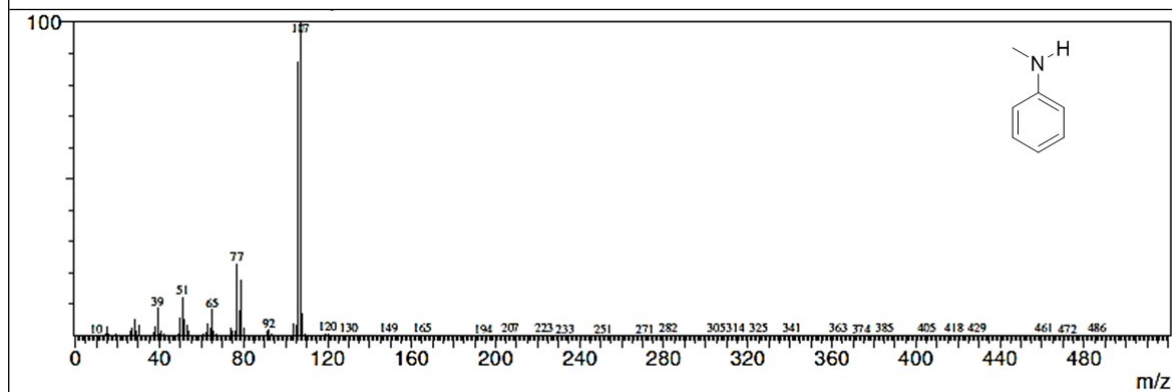

**Figure S4.10.** Mass spectrum of *N*-methylaniline

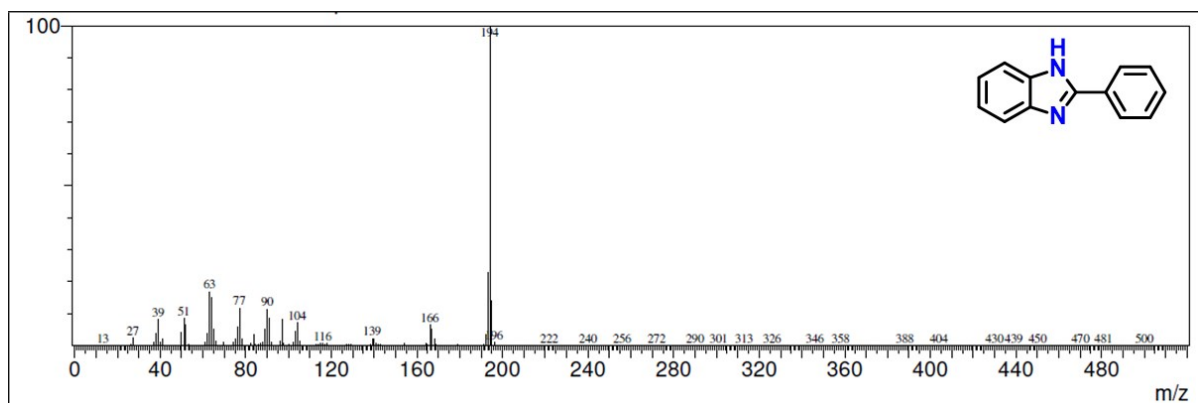

**Figure S4.11.** Mass spectrum of 2-phenyl benzimidazole

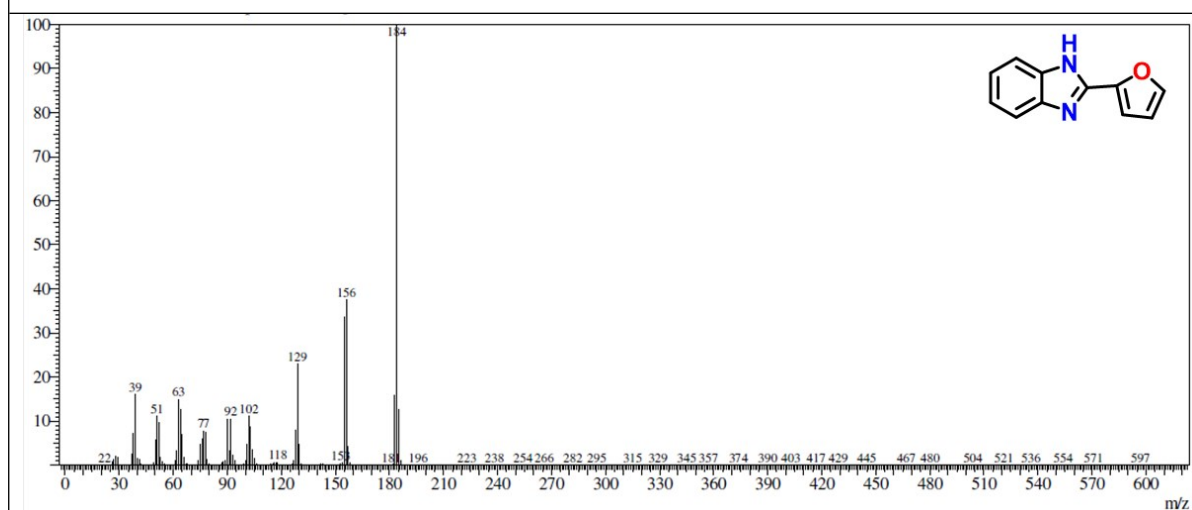

**Figure S4.12.** Mass spectrum of 2-furan benzimidazole

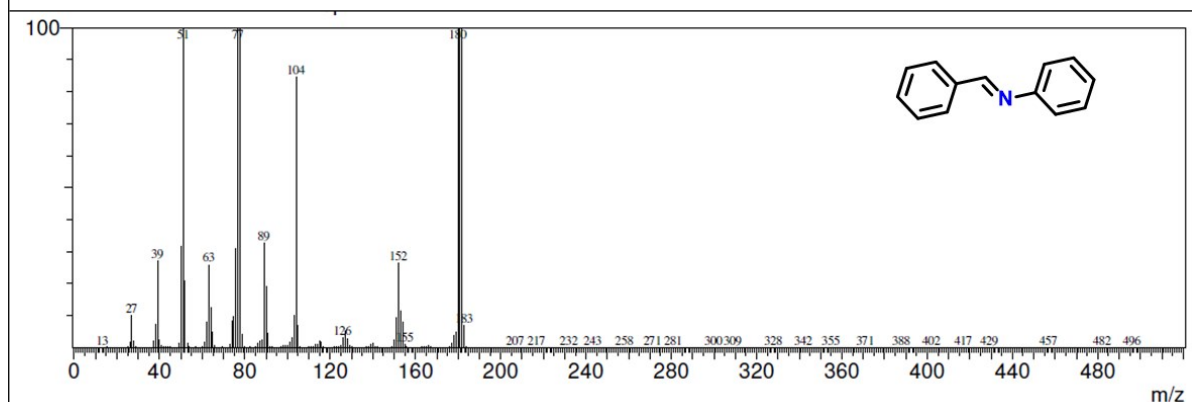

**Figure S4.13.** Mass spectrum of *N*-1-diphenylmethanimine



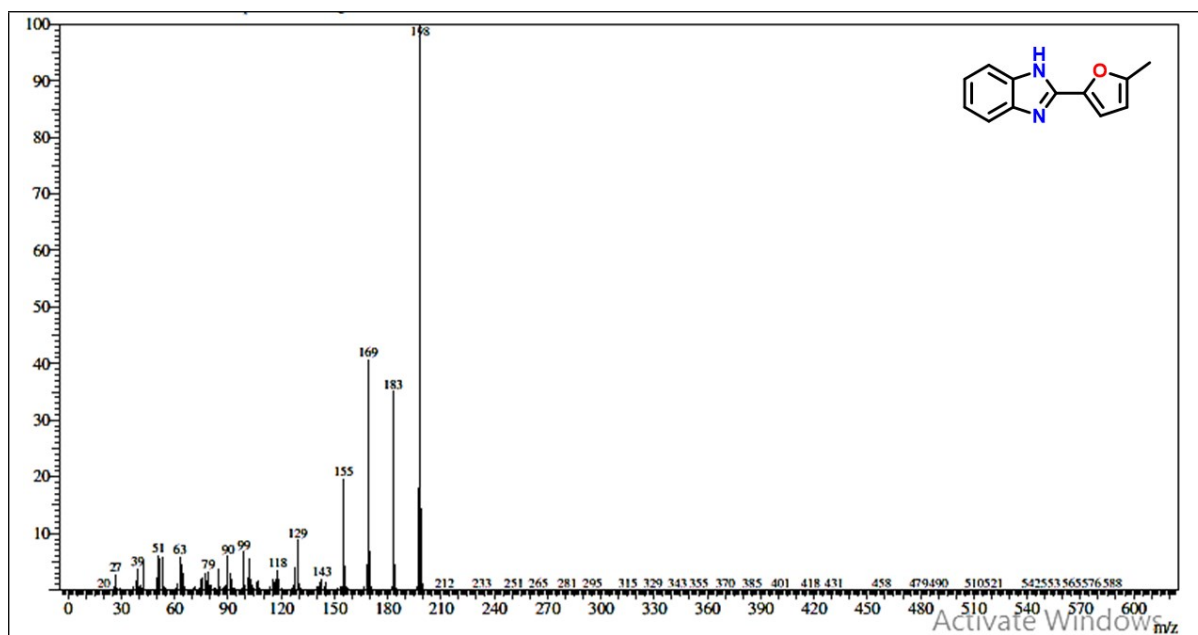

**Figure S4.14.** Mass spectrum of 2-(5-methylfuran-2-yl)-1H-benzo[d]imidazole

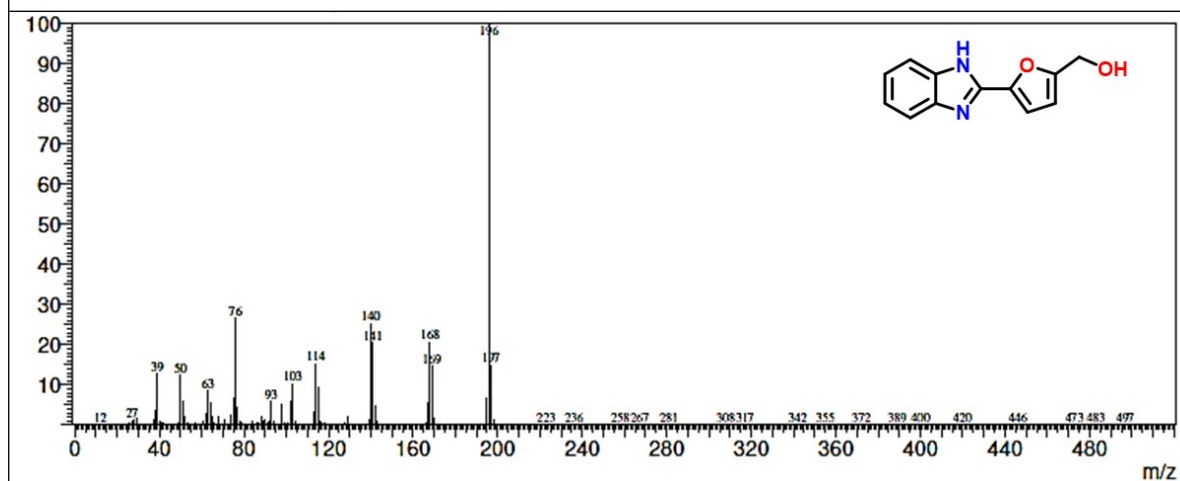

**Figure S4.15.** Mass spectrum of (5-(1H-benzo[d]imidazol-2-yl)furan-2-yl)methanol

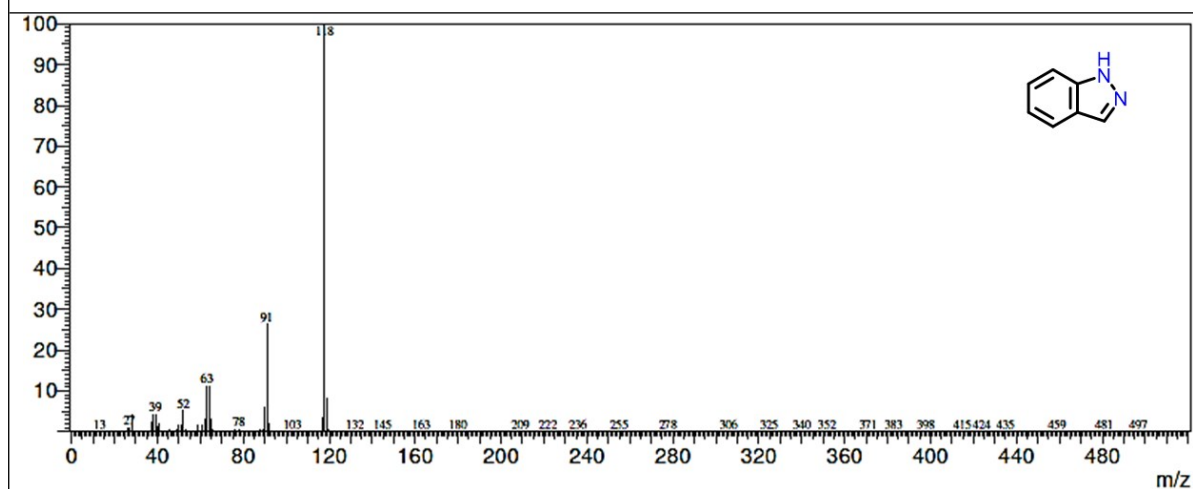

**Figure S4.16.** Mass spectrum of 1H-indazole

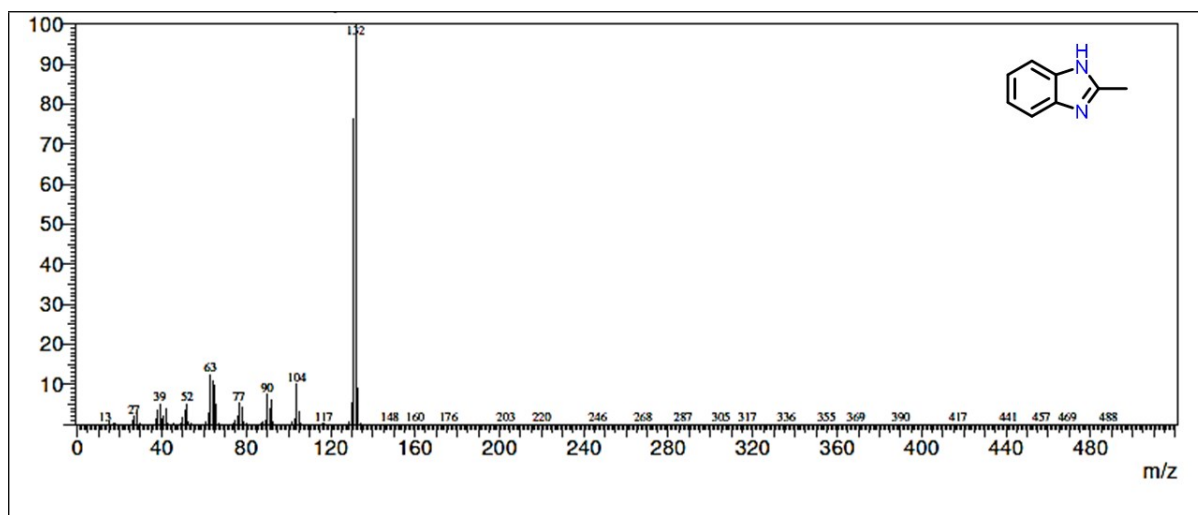

**Figure S4.17.** Mass spectrum of 2-methyl-1H-benzo[d]imidazole

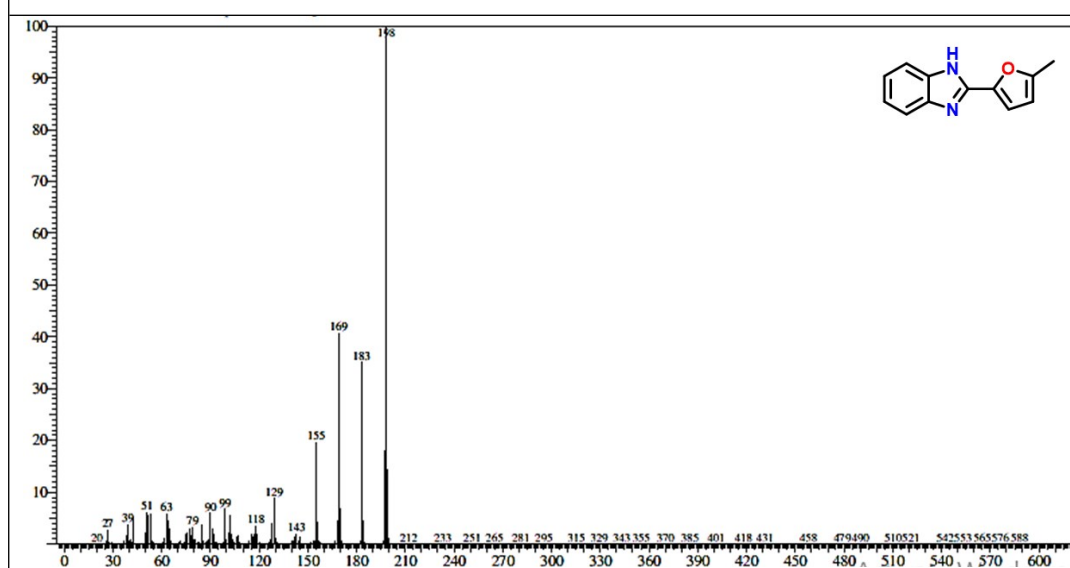

**Figure S4.17.** Mass spectrum of 2-methyl-1H-benzo[d]imidazole

## S7. Recyclability studies of Ni@NC-DC catalyst

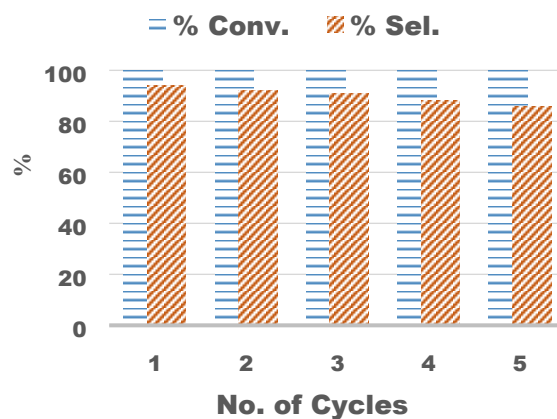

**Figure S5.** Recyclability studies of Ni@NC-DC catalyst.

## S8. SEM analysis of catalyst before and after reaction

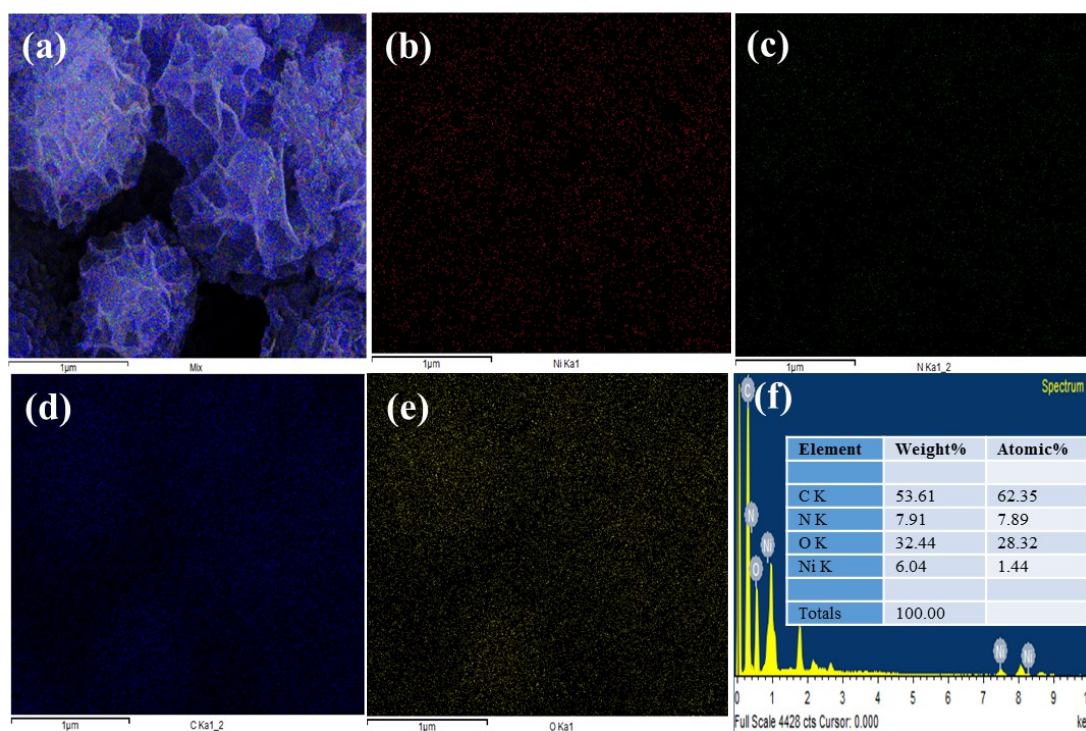

**Figure S6.** SEM elemental mapping of Fresh catalyst; Distribution of (a) Ni, N, C and O; (b) Nickel; (c) Nitrogen; (d) Carbon; (e) Oxygen and (f) SEM-EDAX.

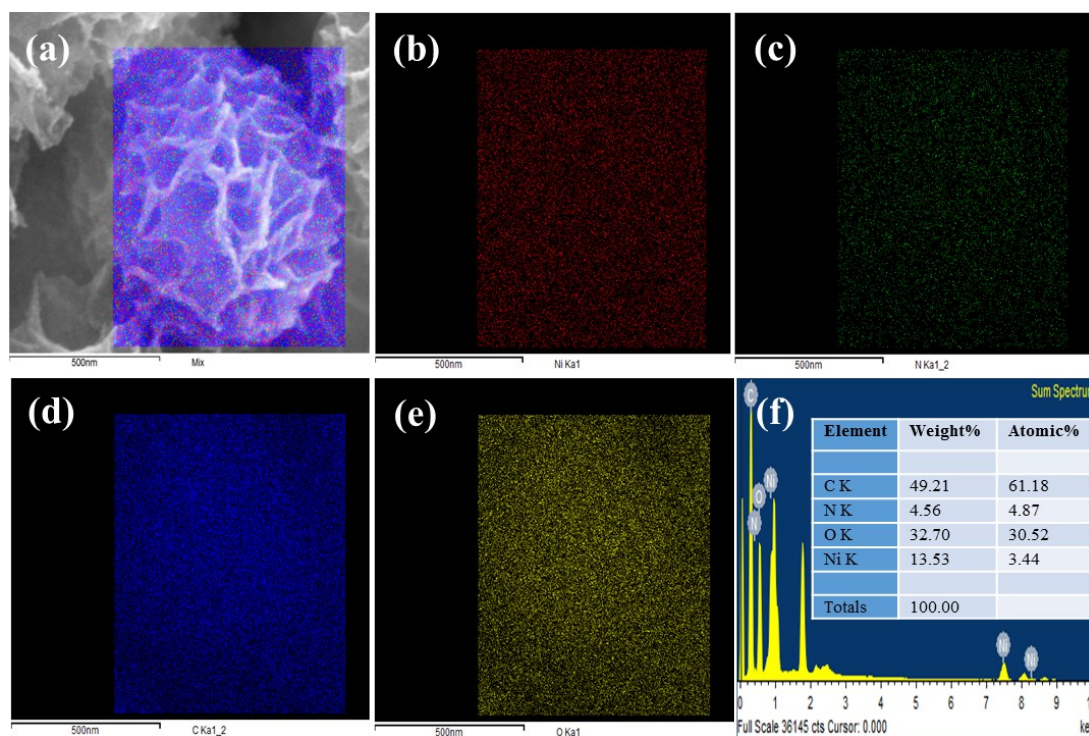

**Figure S7.** SEM elemental mapping of the catalyst after 5<sup>th</sup> cycle; Distribution of (a) Ni, N, C and O; (b) Nickel; (c) Nitrogen; (d) Carbon; (e) Oxygen and (f) SEM-EDAX.

## S9. Comparison table for reductive amination using heterogeneous catalyst

**Table S1.** Comparison of different catalysts for reductive hydrogenation between nitrobenzene and benzaldehyde.

| Catalyst                             | Solvent               | Hydrogen source                  | Temp. (°C) | Press. (Mpa) | Time (h) | Conv. (%) | Selec. (%) |       | Ref.             |
|--------------------------------------|-----------------------|----------------------------------|------------|--------------|----------|-----------|------------|-------|------------------|
|                                      |                       |                                  |            |              |          |           | 2° Amine   | Imine |                  |
| Colloid Pd NPs                       | MeOH                  | H <sub>2</sub>                   | 25         | NS           | 6        | NS        | 88         | NS    | 1                |
| Mo <sub>3</sub> S <sub>4</sub>       | THF <sup>a</sup>      | H <sub>2</sub>                   | 70         | 2            | 18       | >99       | 99         | 0     | 2                |
| Mo <sub>3</sub> S <sub>4</sub>       | THF <sup>b</sup>      | H <sub>2</sub>                   | 70         | 2            | 18       | 50        | 0          | 30    | 3                |
| Fe+PdC                               | H <sub>2</sub> O      | H <sub>2</sub> O:CO <sub>2</sub> | 80         | -            | 10       | 86        | 33         | 50    | 4                |
| Fe+FeCl <sub>2</sub>                 | H <sub>2</sub> O      | H <sub>2</sub> O:CO <sub>2</sub> | 80         | -            | 10       | 94        | NS         | 93    | 4                |
| Pd/Fe <sub>3</sub> O <sub>4</sub> @C | H <sub>2</sub> O      | H <sub>2</sub>                   | 60         | NS           | 8        | 99        | 92         | NS    | 5                |
| Au@TiO <sub>2</sub>                  | H <sub>2</sub> O      | HCOOH                            | 80         | -            | 3        | >99       | 97         | 1     | 6                |
| MoS <sub>2</sub>                     | EtOH                  | H <sub>2</sub>                   | 120        | 2            | 5        | 100       | 85.2       | 0.7   | 7                |
| MoS <sub>2</sub>                     | H <sub>2</sub> O      | H <sub>2</sub>                   | 120        | 2            | 5        | 62.1      | 2.3        | 74.9  | 7                |
| Pd@ZSM-5                             | H <sub>2</sub> O      | NaBH <sub>4</sub>                | 25         | -            | 20 min   | 100       | 98         | NS    | 8                |
| AgPd@C <sub>3</sub> N <sub>4</sub>   | H <sub>2</sub> O      | HCOOH                            | 20         | -            | 20       | >99       | >99        | NS    | 9                |
| Co <sub>2</sub> Rh <sub>2</sub> /C   | MeOH                  | H <sub>2</sub>                   | 25         | 0.1          | 24       | 100       | 93         | -     | 10               |
| Co-Nx/C-800-AT                       | EtAc                  | HCOOH                            | 150        | -            | 10       | 100       | 96         | NS    | 11               |
| Co@CN-600-AT                         | THF                   | HCOOH                            | 190        | -            | 15       | 100       | 96.1       | NS    | 12               |
| Co@CN-600-AT                         | THF                   | HCOOH                            | 110        | -            | 10       | 64.5      | 9.4        | 83.9  | 12               |
| Co@NSC                               | THF:H <sub>2</sub> O  | HCOOH                            | 170        | -            | 6        | 100       | 94.9       | NS    | 13               |
| Co-SiCN <sup>c</sup>                 | EtOH:H <sub>2</sub> O | H <sub>2</sub>                   | 110        | 5            | 24       | NS        | NS         | 82    | 14               |
| CoOx@NC-800                          | THF: H <sub>2</sub> O | H <sub>2</sub>                   | 110        | 5            | 24       | NS        | NS         | 88    | 15               |
| Ni@NC-700-1.5                        | THF: H <sub>2</sub> O | H <sub>2</sub>                   |            | 2            | 4        | >99       | 46.26      | 34.4  | 16               |
| Ni@NC-600-1.5                        | THF: H <sub>2</sub> O | H <sub>2</sub>                   |            | 2            | 4        | >99       | 97.96      | 2.04  | 16               |
| Ni@NC-DC                             | THF:H <sub>2</sub> O  | H <sub>2</sub>                   | 100        | 20           | 4        | 100       | 95         | 95    | <b>This work</b> |

<sup>a</sup>water in ppm <sup>b</sup>Molecular Sieves <sup>c</sup> Triethylamine as additive. NS: Not specified

## References.

1. B. Sreedhar, P. Surendra Reddy, and D. Keerthi Devi, Direct One-Pot Reductive Amination of Aldehydes with Nitroarenes in a Domino Fashion: Catalysis by Gum-Acacia-Stabilized Palladium Nanoparticles. *J. Org. Chem.* 2009, **74**, 22
2. A. L. Nuzhdin, E. A. Artiukha, G. A. Bukhtiyarova, E. A. Derevyannikova, V. I. Bukhtiyarov, Synthesis of secondary amines by reductive amination of aldehydes with nitroarenes over supported copper catalysts in a flow reactor. *Catal. Commun.*, 2017, **102**, 108-113.
3. E. Pedrajas, I. Sorribes, K. Junge, M. Beller, R. Llusar, Selective reductive amination of aldehydes from nitro compounds catalyzed by molybdenum sulfide clusters. *Green Chem.*, 2017, **19(16)**, 3764-3768
4. R. Ma, Y-B Zhou, L.-N. He, Carbon dioxide promoted reductive amination of aldehydes in water mediated by iron powder and catalytic palladium on activated carbon. *Catal. Today*, 2016, **274**, 35-39
5. Xingchun Zhou, Xinzhe Li, Lixin Jiao, Hongfei Huo and Rong Li, Programmed Synthesis Palladium Supported on Fe<sub>3</sub>O<sub>4</sub>@C: An Efficient and Heterogeneous Recyclable Catalyst for One-Pot Reductive Amination of Aldehydes with Nitroarenes in Aqueous Reaction Medium. *Catal Lett*, 2015, **145**, 1591–1599
6. Q. Zhang, S.-S. Li, M.-M. Zhu, Y.-M. Liu, H-Y He and Y Cao, Direct reductive amination of aldehydes with nitroarenes using bio-renewable formic acid as a hydrogen source, *Green Chem.*, 2016, **18**, 2507
7. Y. Zhang, Y. Gao, S. Yao, S. Li, H. Asakura, K. Teramura, H. Wang, and D Ma, Sublimation-Induced Sulfur Vacancies in MoS<sub>2</sub> Catalyst for One-Pot Synthesis of Secondary Amines, *ACS Catal.* 2019, **9**, 7967–7975
8. Roozbeh Javad Kalbasi and Omid Mazaheri Facile one-pot tandem reductive amination of aldehydes from nitroarenes over a hierarchical ZSM-5 zeolite containing palladium Nanoparticles *NewJ.Chem.*, 2016, 40, 9627
9. E. A. Artiukha, A. L. Nuzhdin, G. A. Bukhtiyarova, V. I. Bukhtiyarov Flow synthesis of secondary amines over Ag/Al<sub>2</sub>O<sub>3</sub> catalyst by one-pot reductive amination of aldehydes with nitroarenes. *RSC Adv.*, 2017, **7**, 45856
10. S. Ergen, B. Nisanci, O. Metin, One-pot reductive amination of aldehydes with nitroarenes using formic acid as the hydrogen donor and mesoporous graphitic carbon nitride supported AgPd alloy nanoparticles as the heterogeneous catalyst, *New. J. Chem.*, 2018, **42**, 10000

11. I. Choi, S. Chun, Y. K. Chung, Bimetallic Cobalt–Rhodium Nanoparticle-Catalyzed Reductive Amination of Aldehydes with Nitroarenes under Atmospheric Hydrogen. *J. Org. Chem.* 2017, **82**, 12771–12777
12. P. Zhou, Z. Zhang, One-pot reductive amination of carbonyl compounds with nitro compounds over the Co-Nx catalyst by transfer hydrogenation, *ChemSusChem* 2017, **10**, 1892
13. L. Jiang, P. Zhou, Z. Zhang, S. Jin, and Q. Chi Synthesis of Secondary Amines from One-Pot Reductive Amination with Formic Acid as the Hydrogen Donor over an Acid-Resistant Cobalt Catalyst, *Ind. Eng. Chem. Res.* 2017, **56**, 12556-12565.
14. H. Guo, B. Wang, P. Qiu, R. Gao, M. Sun and L. Chen, N, S-Co doped Carbon Shells Embedded with Ultrafine Co NPs for Reductive Amination with Formic Acid. *ACS Sustainable Chem. Eng.* 2019, **7**, 8876-8884.
15. T. Schwob and R. A. Kempe, A Reusable Co Catalyst for the Selective Hydrogenation of Functionalized Nitroarenes and the Direct Synthesis of Imines and Benzimidazoles from Nitroarenes and Aldehydes. *Angew. Chem. Int. Ed.* 2016, **55**, 15175-15179.
16. T. Song, P. Ren, Y. Duan, Z. Wang, X. Chen and Y. Yang, Cobalt nanocomposites on N-doped hierarchical porous carbon for highly selective formation of anilines and imines from nitroarenes. *Green Chem.*, 2018, **20**, 4629-4637.
